# Supplementary material for: Sex differences in obesity incidence: 20‐year prospective cohort in South Africa
Source: PubMed Central journal article supplement (PMC4832364; doi:10.1111/ijpo.12039), 2015-05-19
Supplement: IJPO-11-75-s001.pdf [file IJPO-11-75-s001.pdf]

## **Supporting Information: Appendices 1 and 2**

Sex differences in obesity incidence: 20-year prospective cohort in South Africa

Elizabeth A Lundeen,<sup>1,2</sup> Shane A Norris,<sup>2</sup> Linda S Adair,<sup>3,2</sup> Linda M Richter,<sup>4,2</sup> Aryeh D Stein<sup>5,2</sup>

1 Nutrition and Health Sciences Program, Division of Biological and Biomedical Sciences, Laney Graduate School, Emory University, Atlanta, USA; 2 MRC Developmental Pathways for Health Research Unit, University of Witwatersrand, Johannesburg, South Africa; 3 Gillings School of Public Health, University of North Carolina - Chapel Hill, Chapel Hill, USA; 4 Human Sciences Research Council, Durban, South Africa; 5 Rollins School of Public Health, Hubert Department of Global Health, Emory University, Atlanta, USA

### **Corresponding author:**

Aryeh D. Stein

Professor

Hubert Department of Global Health and Department of Epidemiology

Rollins School of Public Health, Emory University

Mail: Mailstop 1518-002-7BB, Emory University, Atlanta GA 30322, USA

Tel: (+1) 404 727 4255; Fax: (+1) 404 727 1278; email: [aryeh.stein@emory.edu](mailto:aryeh.stein@emory.edu)

**Appendix 1. Measures of overweight and obesity among South African boys and girls from 1-2y to 16-18y<sup>1</sup>, Birth-to-Twenty Cohort (Sensitivity analysis: presenting figures based on cross-sectional, or all available, data at each time period)**

|                                 | 1-2y <sup>9</sup><br>(n=2,163) | 4-8y<br>(n=2,162) | 11-12y<br>(n=1,839) | 13-15y<br>(n=2,192) | 16-18y<br>(n=2,113) |
|---------------------------------|--------------------------------|-------------------|---------------------|---------------------|---------------------|
| <b>Obesity<sup>2</sup></b>      |                                |                   |                     |                     |                     |
| WHO definition <sup>3</sup>     |                                |                   |                     |                     |                     |
| Boys                            | 9.4 (7.6, 11.1)                | 3.4 (2.3, 4.5)    | 5.5 (4.0, 7.0)      | 4.5 (3.2, 5.7)      | 3.0 (1.9, 4.0)      |
| Girls                           | 9.1 (7.5, 10.8)                | 2.9 (1.9, 3.9)    | 6.7 (5.2, 8.3)      | 7.9 (6.3, 9.4)      | 8.7 (7.1, 10.4)     |
| IOTF definition <sup>4</sup>    |                                |                   |                     |                     |                     |
| Boys                            | 5.0 (3.6, 6.3)                 | 1.5 (0.8, 2.3)    | 3.2 (2.0, 4.4)      | 3.6 (2.5, 4.8)      | 2.6 (1.6, 3.5)      |
| Girls                           | 5.7 (4.4, 7.1)                 | 2.0 (1.1, 2.8)    | 5.3 (3.9, 6.7)      | 6.6 (5.1, 8.0)      | 8.1 (6.5, 9.7)      |
| CDC definition <sup>5</sup>     |                                |                   |                     |                     |                     |
| Boys                            | 15.0 (12.8, 17.1)              | 6.9 (5.4, 8.5)    | 8.7 (6.8, 10.5)     | 6.2 (4.7, 7.7)      | 4.1 (2.9, 5.4)      |
| Girls                           | 14.0 (12.0, 16.0)              | 5.5 (4.2, 6.8)    | 10.6 (8.6, 12.5)    | 12.4 (10.5, 14.3)   | 13.0 (11.0, 15.0)   |
| <b>Overweight<sup>2,6</sup></b> |                                |                   |                     |                     |                     |
| WHO definition <sup>7</sup>     |                                |                   |                     |                     |                     |
| Boys                            | 18.8 (16.4, 21.2)              | 15.7 (13.5, 17.9) | 9.8 (7.8, 11.8)     | 7.1 (5.6, 8.7)      | 5.3 (3.9, 6.7)      |
| Girls                           | 18.7 (16.5, 21.0)              | 12.3 (10.3, 14.2) | 15.1 (12.8, 17.3)   | 15.8 (13.7, 18.0)   | 17.7 (15.4, 19.9)   |
| IOTF definition <sup>4</sup>    |                                |                   |                     |                     |                     |
| Boys                            | 14.6 (12.5, 16.7)              | 6.4 (4.9, 7.9)    | 8.2 (6.4, 10.0)     | 6.8 (5.2, 8.3)      | 6.1 (4.6, 7.6)      |
| Girls                           | 15.6 (13.5, 17.7)              | 8.1 (6.5, 9.7)    | 13.2 (11.0, 15.3)   | 14.6 (12.6, 16.7)   | 17.7 (15.4, 19.9)   |
| CDC definition <sup>8</sup>     |                                |                   |                     |                     |                     |
| Boys                            | 11.6 (9.6, 13.5)               | 11.3 (9.4, 13.2)  | 6.5 (4.9, 8.1)      | 5.1 (3.8, 6.5)      | 4.1 (2.9, 5.4)      |
| Girls                           | 12.7 (10.8, 14.7)              | 9.1 (7.4, 10.7)   | 10.9 (8.9, 12.9)    | 10.8 (9.0, 12.6)    | 12.7 (10.7, 14.6)   |

1 Infant/toddler – 1y or 2y; early childhood – 4y, 5y, or 8y; early adolescence – 11y or 12y; mid-adolescence – 13y, 14y, 15y; late adolescence – 16y, 17y, 18y

2 % (95% confidence interval)

3 World Health Organization (WHO) defines obesity as BMI z score > 2.0 SD from the reference median

4 International Obesity Task Force (IOTF) defines obesity and overweight using age- and sex-specific cut-off points for children 2-18 y, which were based on models that adapted the adult cut-off points for overweight ( $25 \leq \text{BMI} < 30$ ) and obese ( $\text{BMI} \geq 30$ ).

5 Centers for Disease Control (CDC) define obesity as BMI  $\geq$  95<sup>th</sup> percentile based on the reference population

6 Overweight, but not obese

7 World Health Organization defines overweight as BMI z score > 1.0 and  $\leq$  2.0 SD from the reference median

8 Centers for Disease Control define overweight as BMI  $\geq$  the 85<sup>th</sup> and < 95<sup>th</sup> percentile based on the reference population

9 The IOTF and CDC definitions for overweight/obesity are for children 2-18 years and 2-19 years, respectively. IOTF and CDC prevalence figures for the infancy/toddlerhood period should be interpreted with caution, as this period contains BMI measurements at 1y and 2y of age. IOTF and CDC cut-off points for 2y were applied to the measurements at 1y.

**Appendix 2. Measures of overweight and obesity among South African boys and girls from 1-2y to 16-18y<sup>1</sup>, Birth-to-Twenty Cohort (Sensitivity analysis: presenting figures based on individuals who were lost-to-follow-up and not in the main analysis)**

|                                 | 1-2y <sup>9</sup><br>(n=991) | 4-8y<br>(n=990)   | 11-12y<br>(n=667) | 13-15y<br>(n=1,020) | 16-18y<br>(n=941) |
|---------------------------------|------------------------------|-------------------|-------------------|---------------------|-------------------|
| <b>Obesity<sup>2</sup></b>      |                              |                   |                   |                     |                   |
| WHO definition <sup>3</sup>     |                              |                   |                   |                     |                   |
| Boys                            | 10.0 (7.3, 12.6)             | 3.8 (2.1, 5.6)    | 4.5 (2.2, 6.8)    | 4.6 (2.7, 6.4)      | 3.6 (1.8, 5.3)    |
| Girls                           | 10.4 (7.8, 13.1)             | 2.7 (1.3, 4.1)    | 7.3 (4.6, 10.0)   | 8.6 (6.2, 10.9)     | 9.8 (7.1, 12.4)   |
| IOTF definition <sup>4</sup>    |                              |                   |                   |                     |                   |
| Boys                            | 5.2 (3.2, 7.2)               | 2.3 (1.0, 3.7)    | 3.2 (1.2, 5.2)    | 4.1 (2.4, 5.9)      | 3.3 (1.7, 5.0)    |
| Girls                           | 6.9 (4.7, 9.1)               | 1.5 (0.5, 2.6)    | 5.6 (3.2, 8.0)    | 7.1 (4.9, 9.3)      | 8.9 (6.4, 11.5)   |
| CDC definition <sup>5</sup>     |                              |                   |                   |                     |                   |
| Boys                            | 16.4 (13.1, 19.7)            | 8.1 (5.6, 10.5)   | 8.1 (5.0, 11.1)   | 6.2 (4.1, 8.4)      | 4.9 (2.9, 6.9)    |
| Girls                           | 15.9 (12.7, 19.1)            | 5.8 (3.8, 7.8)    | 11.8 (8.4, 15.1)  | 12.3 (9.5, 15.1)    | 13.4 (10.4, 16.4) |
| <b>Overweight<sup>2,6</sup></b> |                              |                   |                   |                     |                   |
| WHO definition <sup>7</sup>     |                              |                   |                   |                     |                   |
| Boys                            | 18.5 (15.0, 21.9)            | 14.9 (11.6, 18.1) | 9.7 (6.4, 13.0)   | 6.4 (4.2, 8.6)      | 4.9 (2.9, 6.9)    |
| Girls                           | 18.5 (15.1, 21.8)            | 12.3 (9.5, 15.2)  | 15.7 (11.9, 19.5) | 13.6 (10.7, 16.5)   | 15.9 (12.6, 19.1) |
| IOTF definition <sup>4</sup>    |                              |                   |                   |                     |                   |
| Boys                            | 16.8 (13.5, 20.2)            | 6.2 (4.0, 8.3)    | 6.8 (4.0, 9.6)    | 6.0 (3.9, 8.1)      | 5.1 (3.1, 7.2)    |
| Girls                           | 16.9 (13.6, 20.2)            | 8.7 (6.2, 11.1)   | 14.3 (10.6, 17.9) | 13.0 (10.2, 15.9)   | 16.1 (12.8, 19.3) |
| CDC definition <sup>8</sup>     |                              |                   |                   |                     |                   |
| Boys                            | 10.6 (7.8, 13.3)             | 10.0 (7.3, 12.7)  | 6.1 (3.4, 8.8)    | 4.6 (2.7, 6.4)      | 3.6 (1.8, 5.3)    |
| Girls                           | 11.8 (9.0, 14.6)             | 8.9 (6.4, 11.3)   | 10.6 (7.4, 13.9)  | 9.3 (6.8, 11.8)     | 11.4 (8.6, 14.2)  |

1 Infant/toddler – 1y or 2y; early childhood – 4y, 5y, or 8y; early adolescence – 11y or 12y; mid-adolescence – 13y, 14y, 15y; late adolescence – 16y, 17y, 18y

2 % (95% confidence interval)

3 World Health Organization (WHO) defines obesity as BMI z score > 2.0 SD from the reference median

4 International Obesity Task Force (IOTF) defines obesity and overweight using age- and sex-specific cut-off points for children 2-18 y, which were based on models that adapted the adult cut-off points for overweight (25≤BMI<30) and obese (BMI≥30).

5 Centers for Disease Control (CDC) define obesity as BMI ≥ 95<sup>th</sup> percentile based on the reference population

6 Overweight, but not obese

7 World Health Organization defines overweight as BMI z score > 1.0 and ≤ 2.0 SD from the reference median

8 Centers for Disease Control define overweight as BMI ≥ the 85<sup>th</sup> and < 95<sup>th</sup> percentile based on the reference population

9 The IOTF and CDC definitions for overweight/obesity are for children 2-18 years and 2-19 years, respectively. IOTF and CDC prevalence figures for the infancy/toddlerhood period should be interpreted with caution, as this period contains BMI measurements at 1y and 2y of age. IOTF and CDC cut-off points for 2y were applied to the measurements at 1y.
